# Supplementary material
Source: PubMed Central journal article supplement (PMC7002247)

# Figure S1

## A

Single cells gated

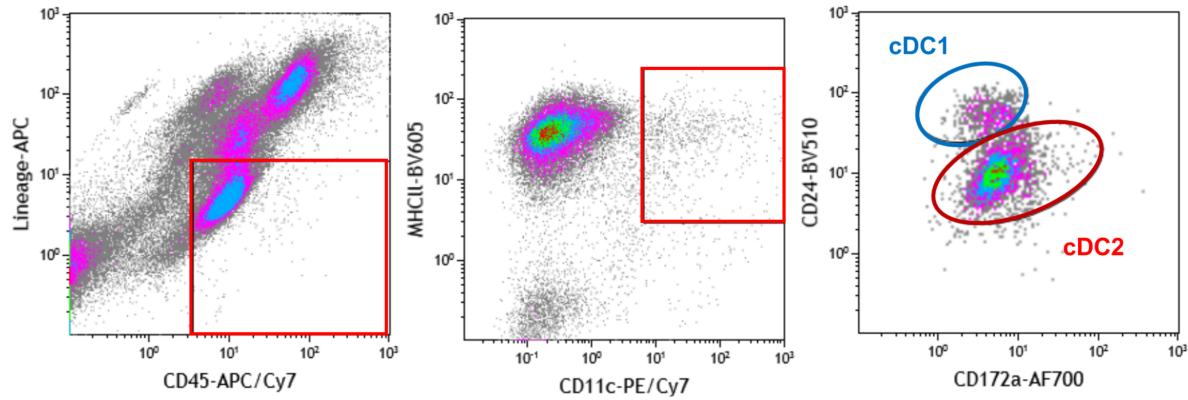

## B

Steady state

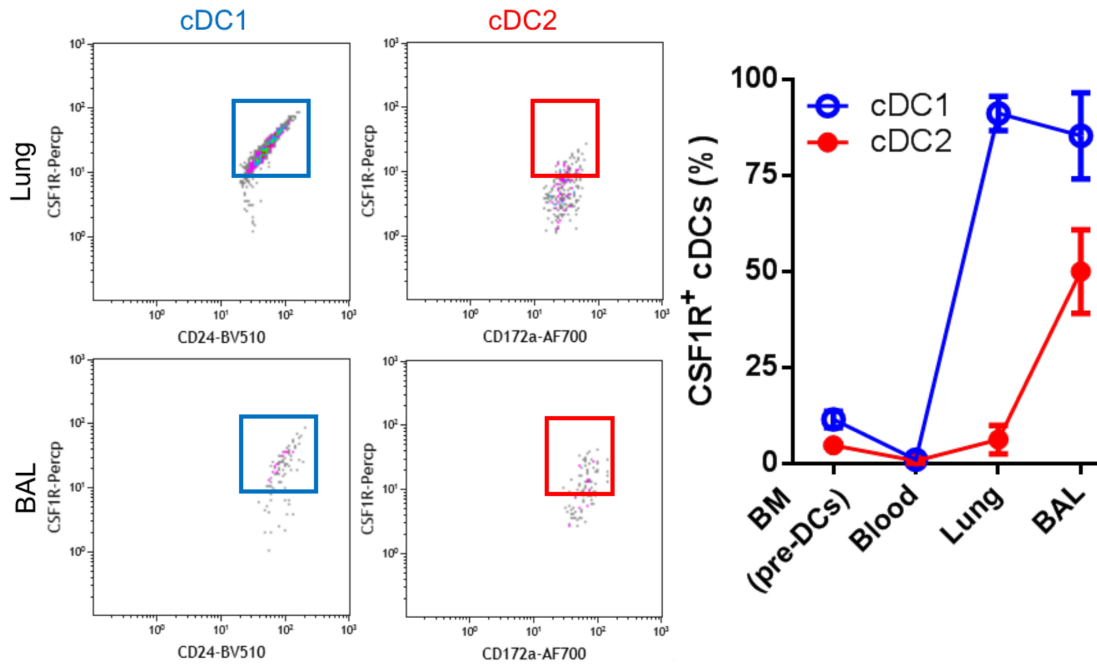

**Figure S2**

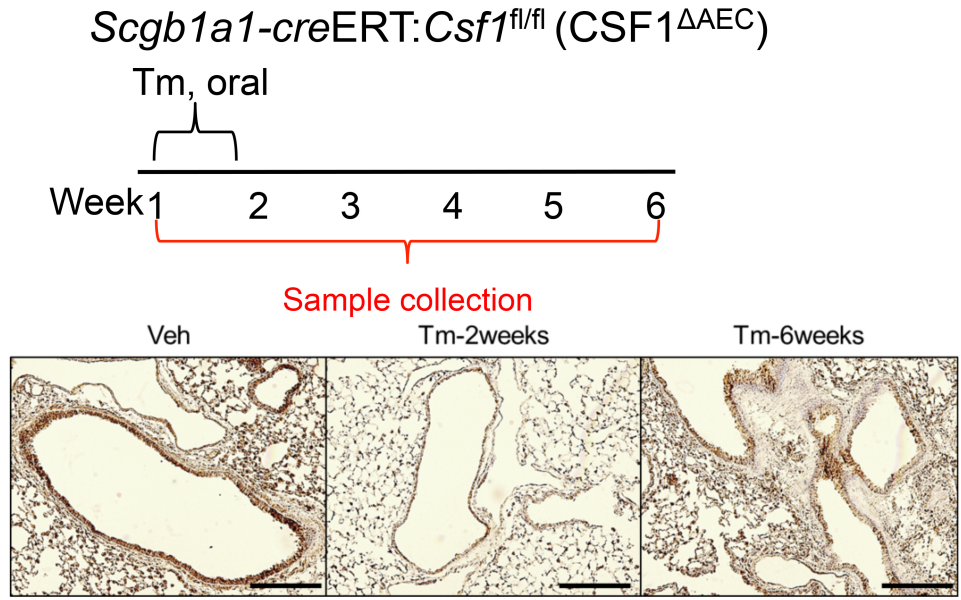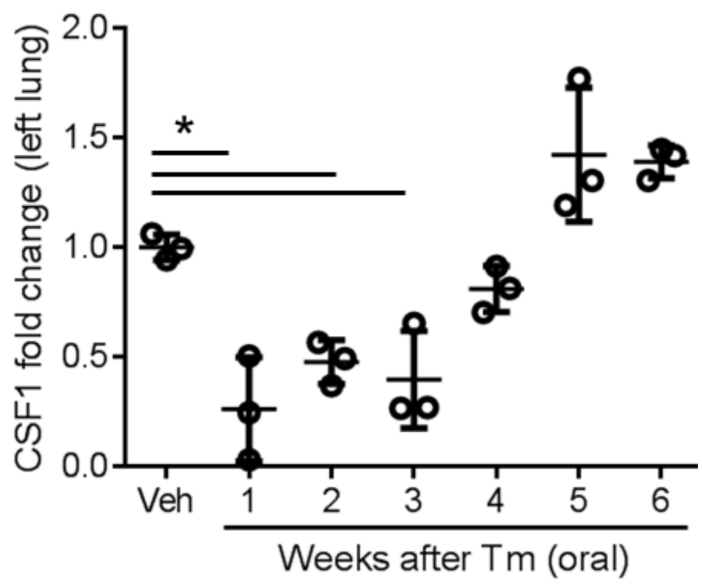

Figure S3

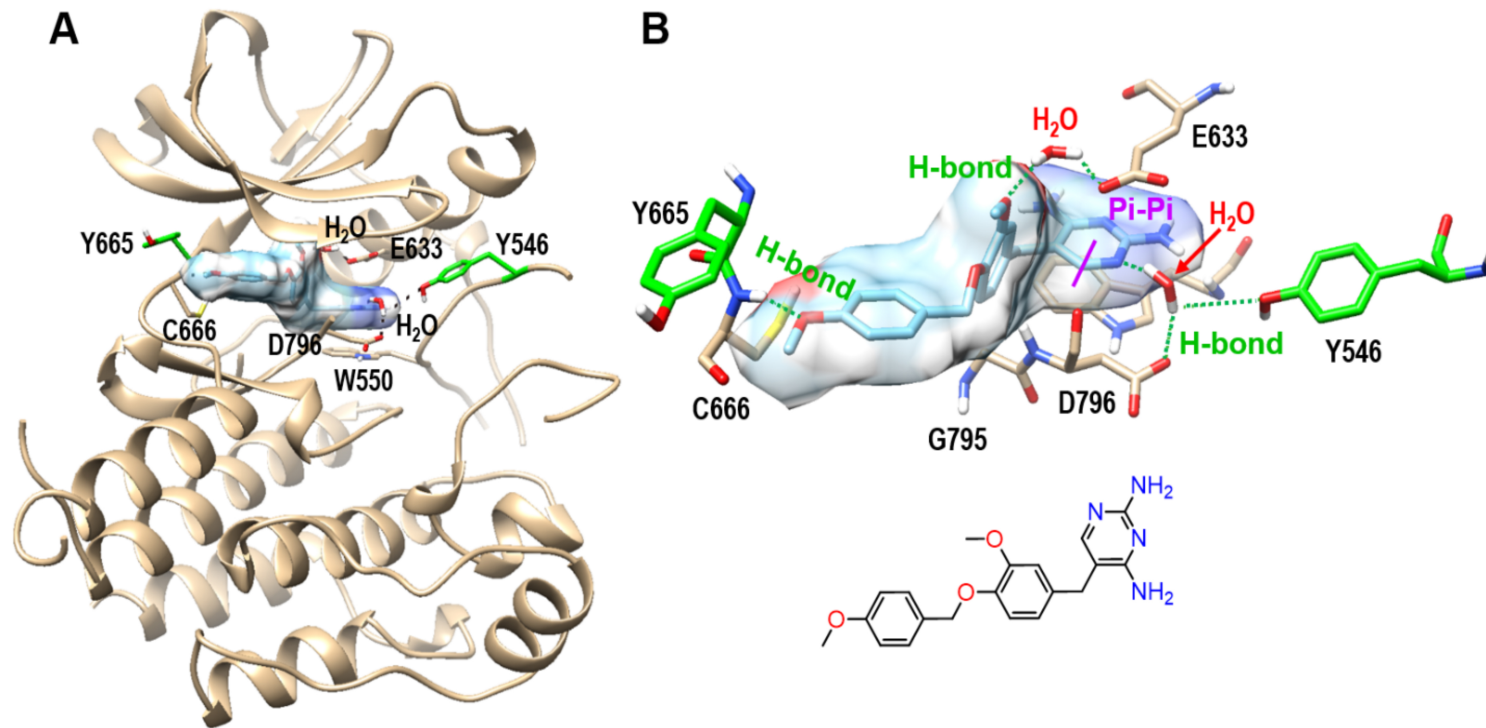

# Figure S4

## A

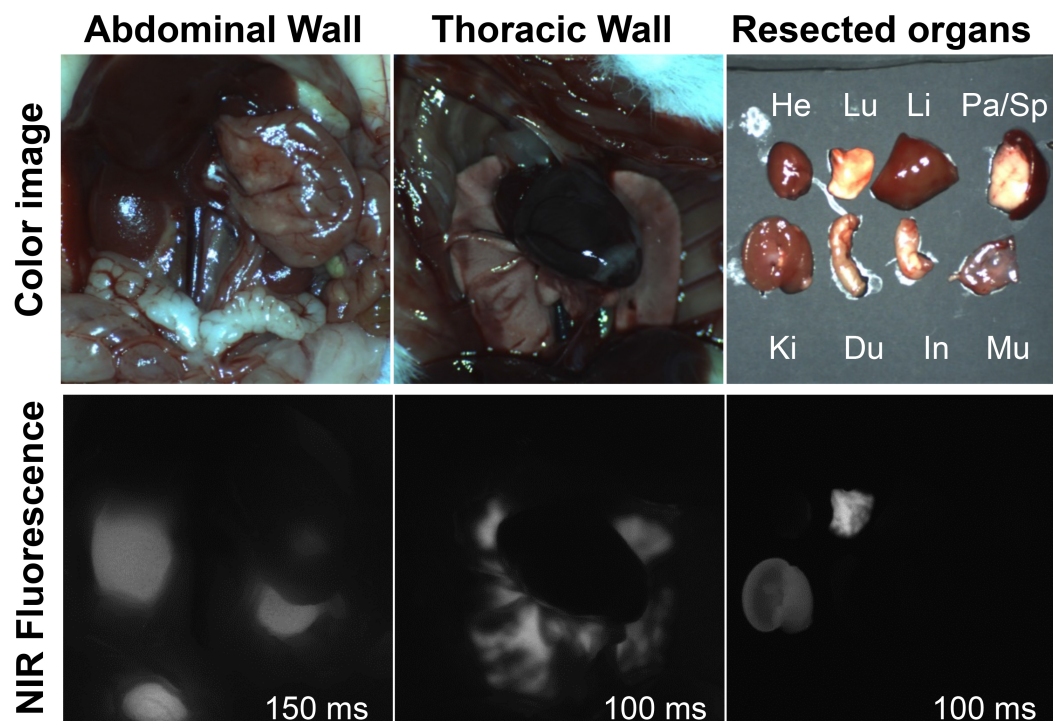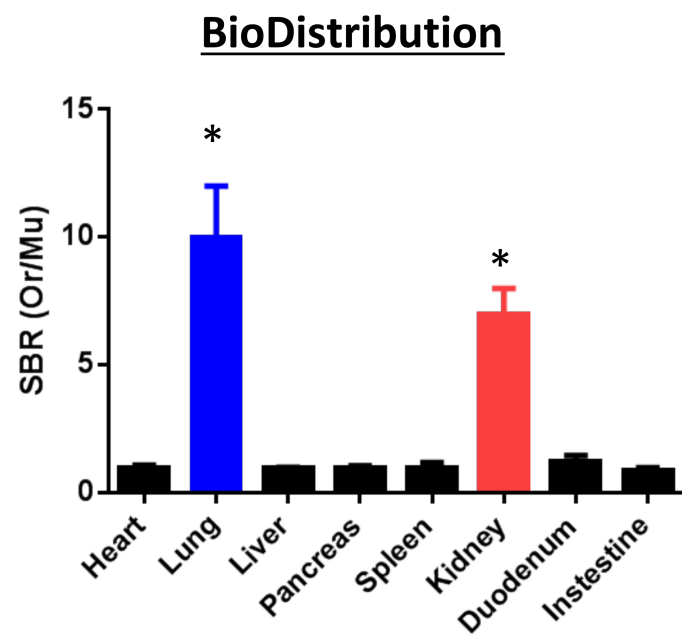

## B

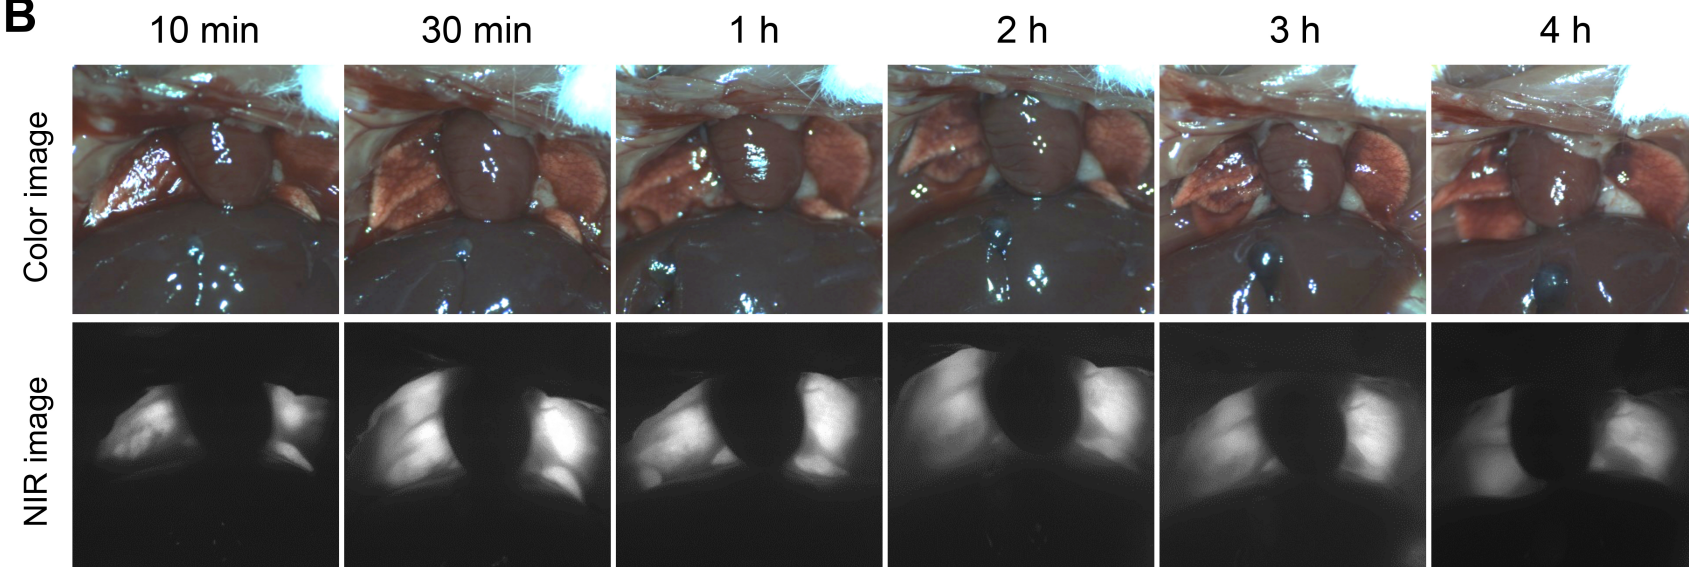

## C

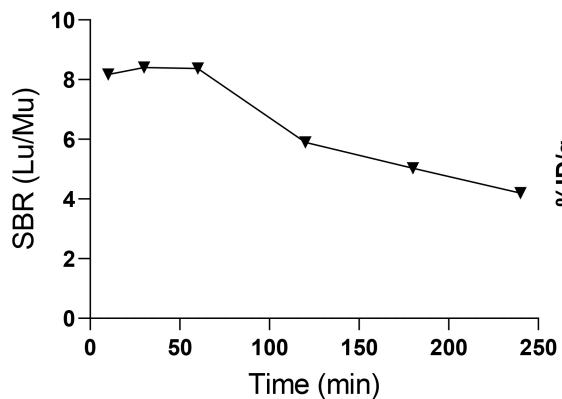

## D

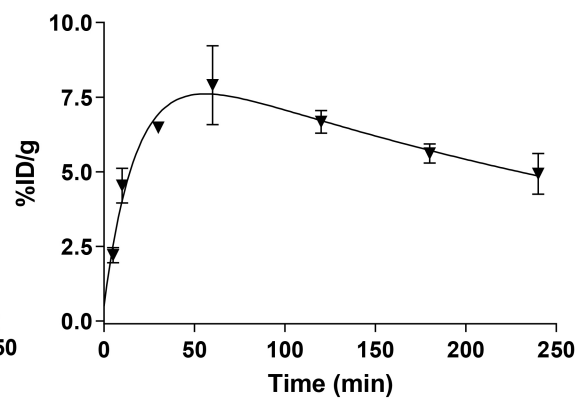

## E

| Pharmacokinetics                | Value    |
|---------------------------------|----------|
| $k_{el}$                        | 0.004668 |
| Half-life, $T_{1/2\beta}$ (min) | 148.46   |
| AUC (%ID/g·min)                 | 1122     |
| Plasma clearance (mL/min)       | 0.1783   |
| Volume of distribution (mL)     | 38.1862  |

**Figure S5**

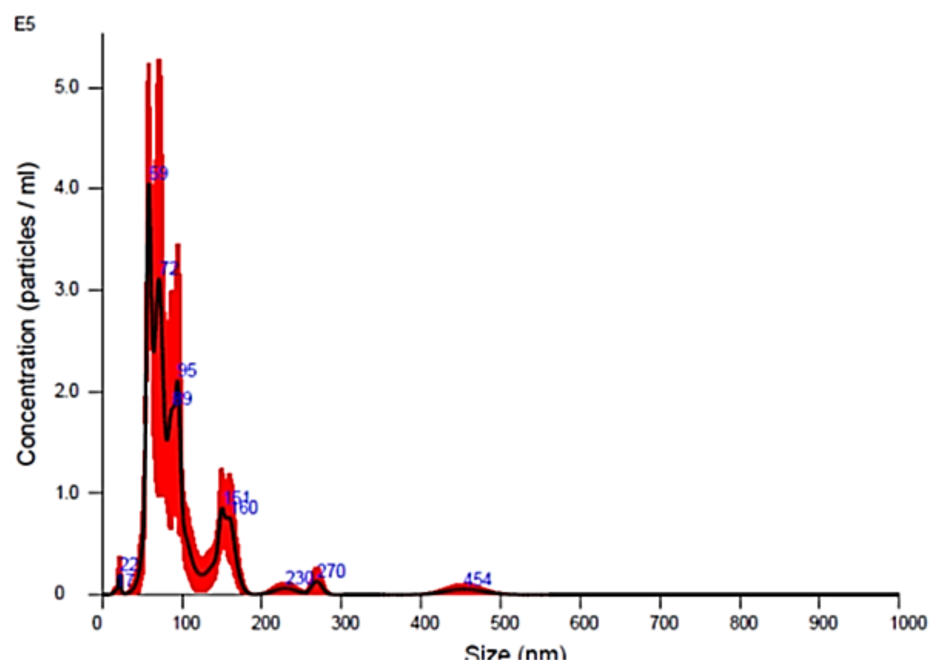

# Figure S6

Single cells

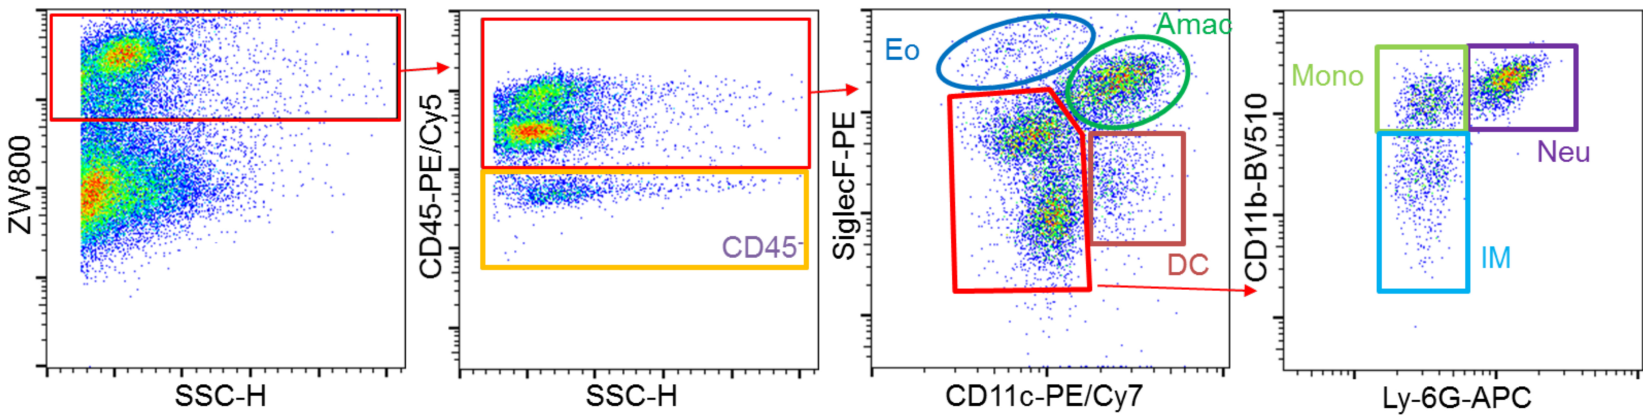

CDPL-GW (1 ng)

CDPL-GW (100 ng)

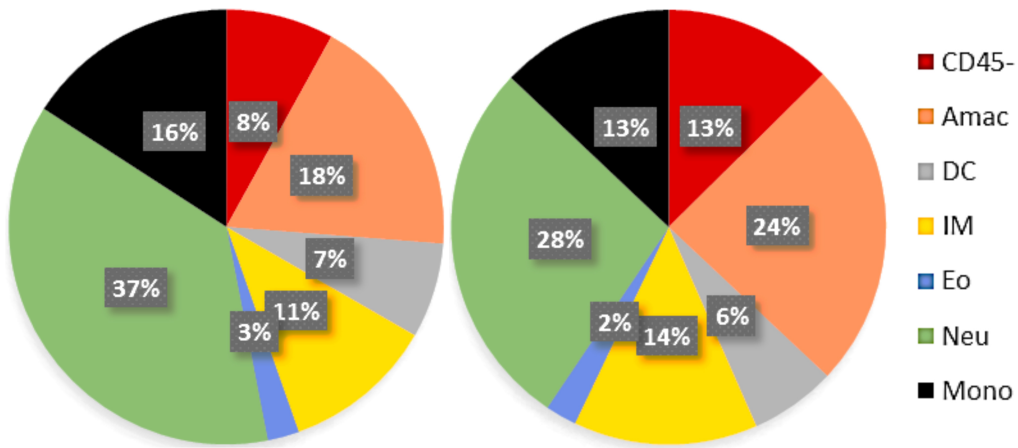

**Figure S7**

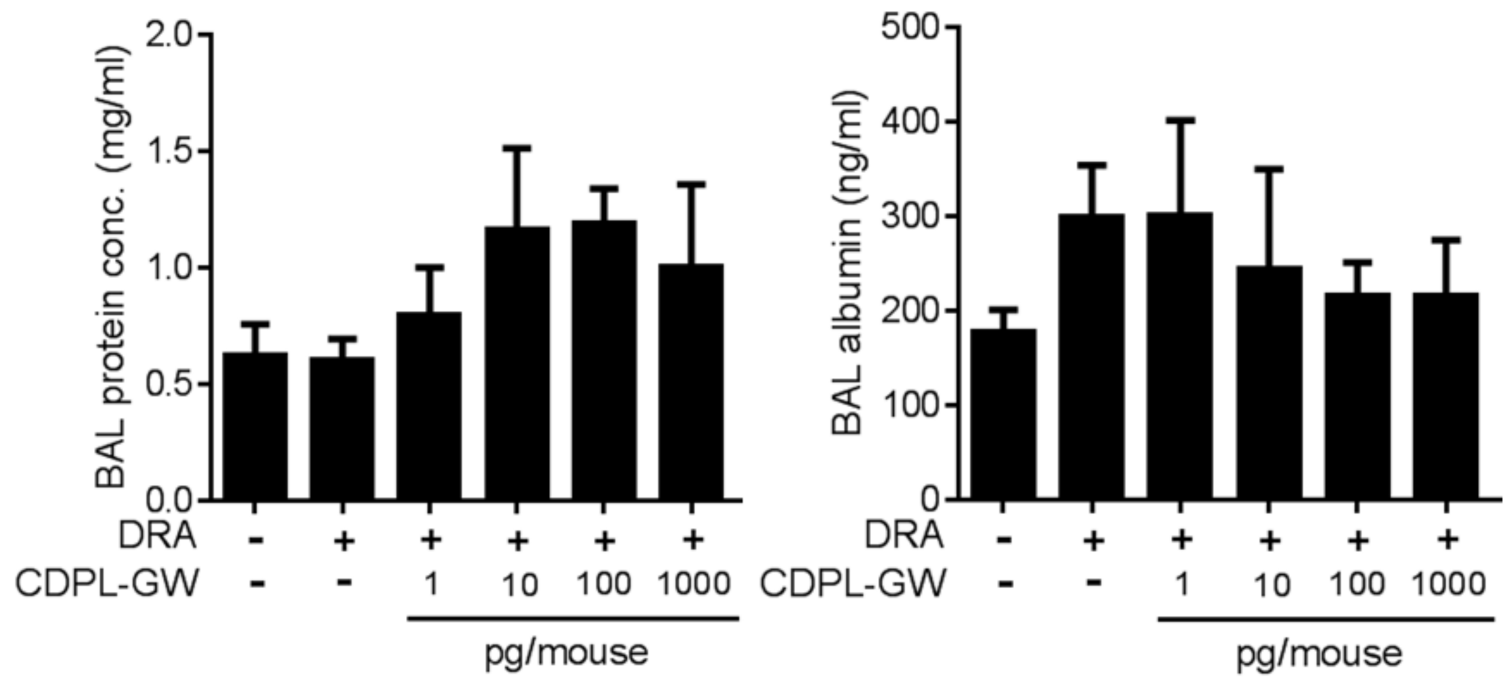

# Figure S8

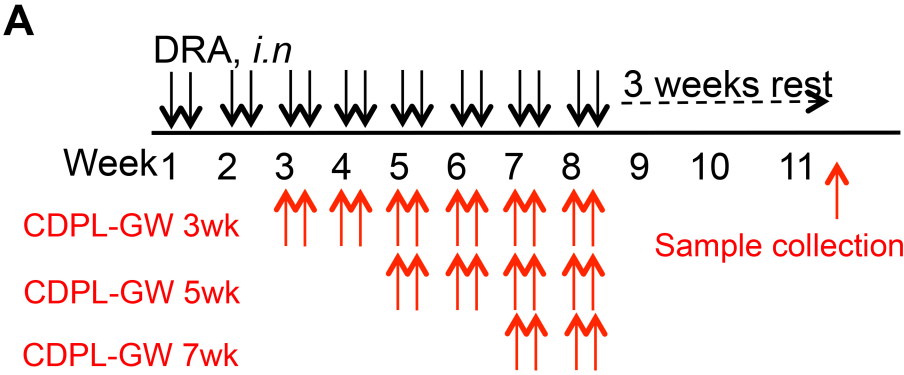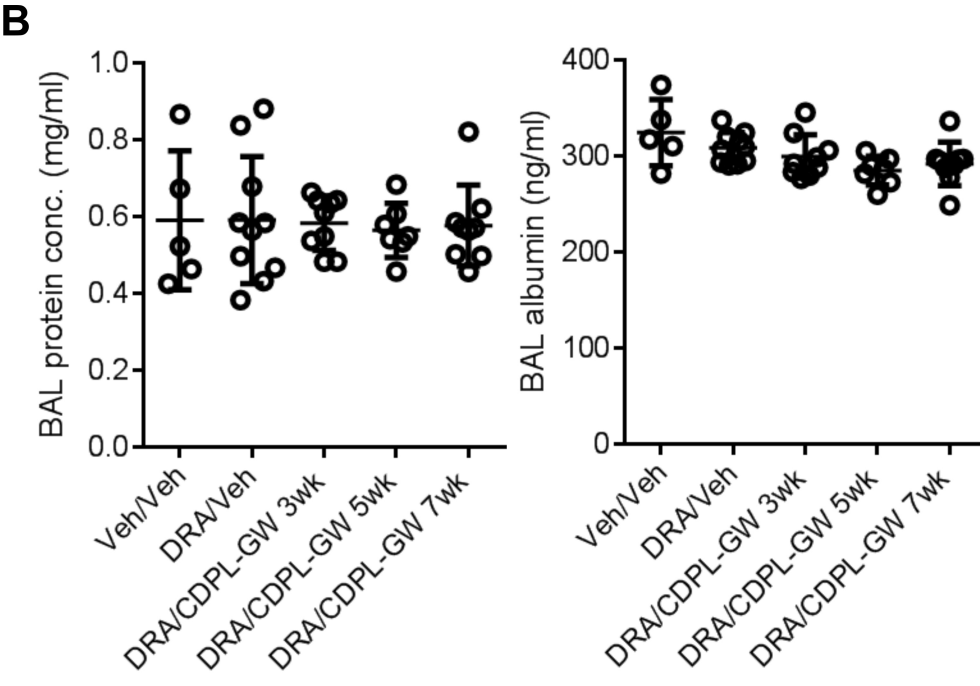

Supplement: NIHMS1044890-supplement-Supp_FigS1-8.pdf [file NIHMS1044890-supplement-Supp_FigS1-8.pdf]
